# Supplementary material
Source: publisher figshare collection journal article supplement (https://diabetesjournals.figshare.com/articles/dataset/_/18813578)
Supplement: Supplementary file 1 [file 1]

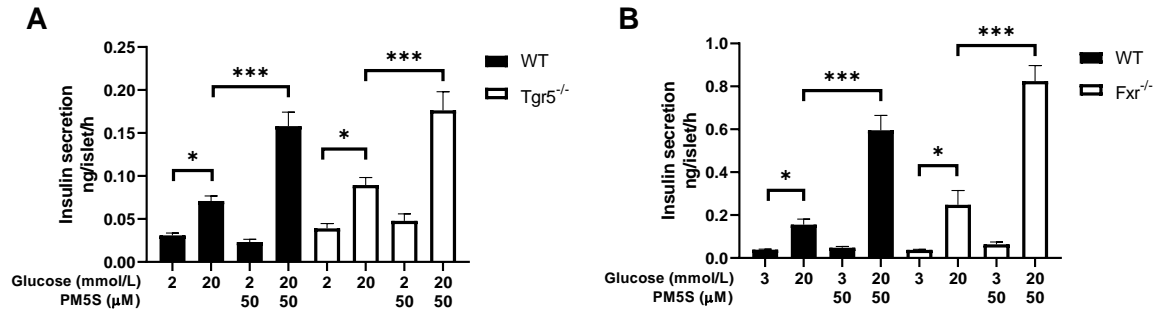

Supplementary Figure 1: PM5S increases glucose-stimulated insulin secretion in murine islets and is not altered in mice deficient of TGR5 or FXR

Islets from mice were isolated and incubated with PM5S at low (2 or 3 mmol/L) and high (20 mmol/L) concentrations of glucose. Insulin secretion in response to incubation with PM5S was assessed from islets that were isolated from (A) WT and Tgr5<sup>-/-</sup> mice or (B) WT and Fxr<sup>-/-</sup> mice. Unless indicated differences between groups were not significant; significance differences are indicated by: \*  $P < 0.05$ , \*\*\*  $P < 0.001$  as determined by one-way ANOVA followed by Tukey's multiple comparisons test or Kruskal-Wallis test followed by Dunn's multiple comparisons test. Data expressed as mean  $\pm$  SEM, for each graph  $n = 3$  independent experiments, each group contained 5 sized matched islets.

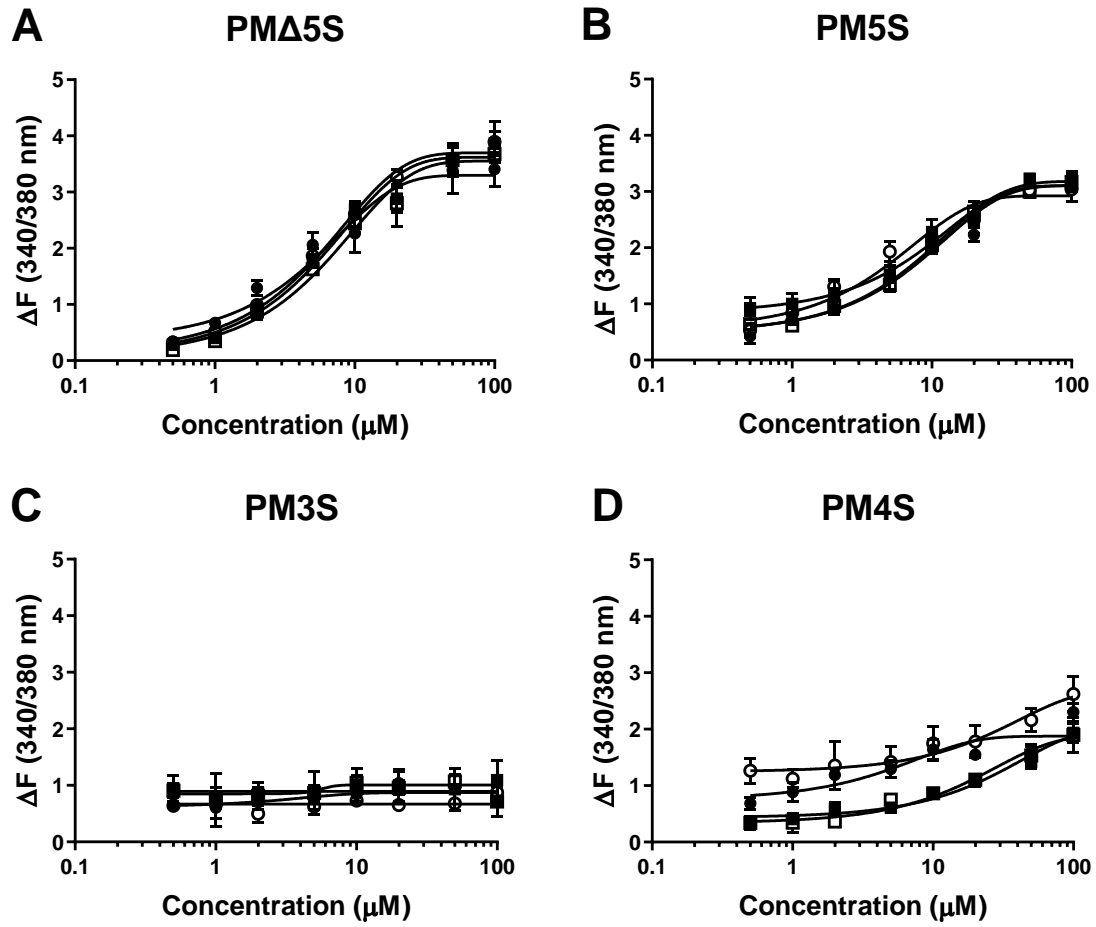

Supplementary Figure 2:  $Ca^{2+}$  concentration is altered by PM $\Delta$ 5S, PM5S and PM4S

HEK cells transfected with TRPM3 were dyed with Fura-2 to image calcium fluorescence. Increasing concentrations of progesterone sulfates were given. Each graph displays 4 replicate experiments for each progesterone sulfate investigated. (A) PM $\Delta$ 5S, (B) PM5S, (C) PM3S, (D) PM4S.  $n = 4$  independent experiments for each progesterone sulfate.

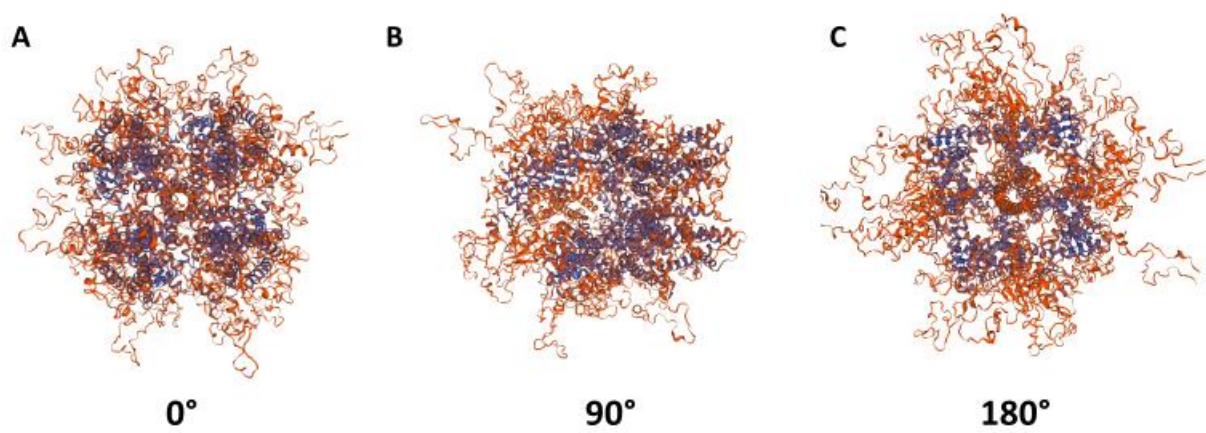

Supplementary Figure 3: Computational structure of TRPM3

Homology model of TRPM3 generated using TRPM7 (PDB code 5ZX5) as a template. TRPM3 is represented at different horizontal rotations: (A) 0° (B) 90° (C) 180°.

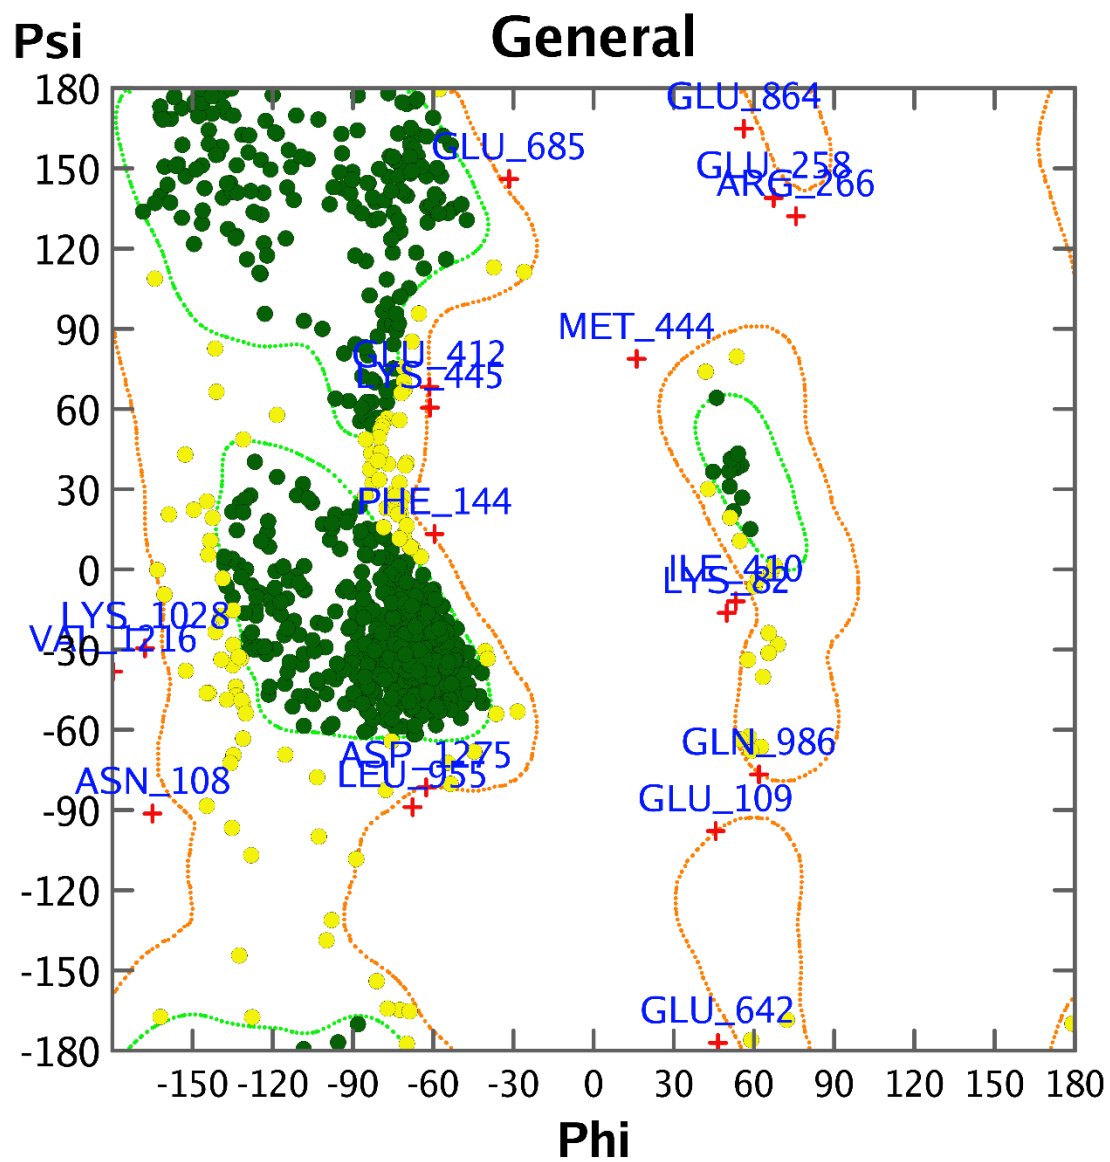

Supplementary Figure 4: Ramachandran plot of human TRPM3.

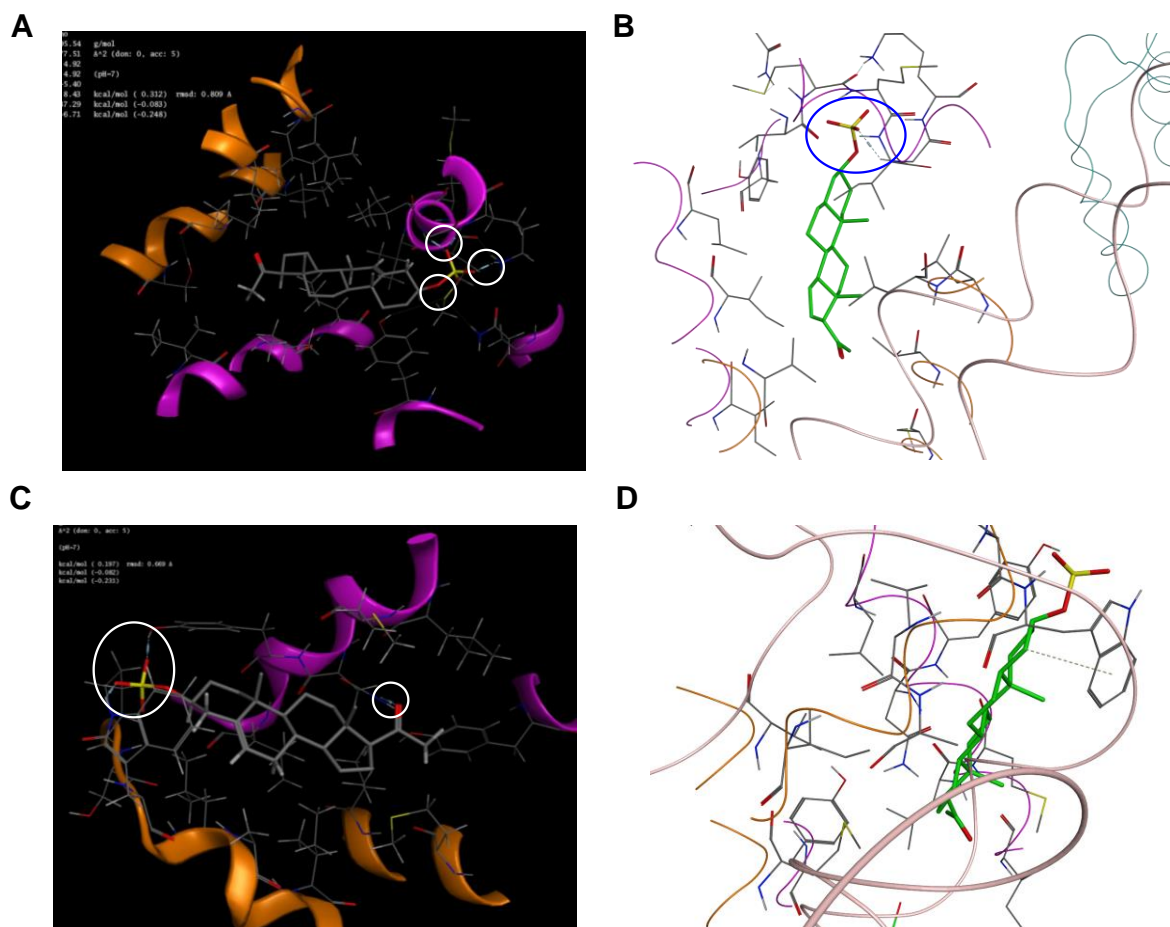

Supplementary Figure 5: 3D images of PM $\Delta$ 5S and PM5S binding to first 2 sites

Progesterone sulfate binding at both sites. (A) and (B) shows the 3D structure of pregnenolone sulfate (PM $\Delta$ 5S, carbon backbone in grey) and epiallopregnanolone sulfate (PM5S, carbon backbone in green), respectively, binding at site 1. The 3D structures of pregnenolone sulfate and epiallopregnanolone sulfate binding at site 2 is shown in (C) and (D) respectively. The white and blue circles highlight key residue interaction with ligand according to Supplementary Figure 6.

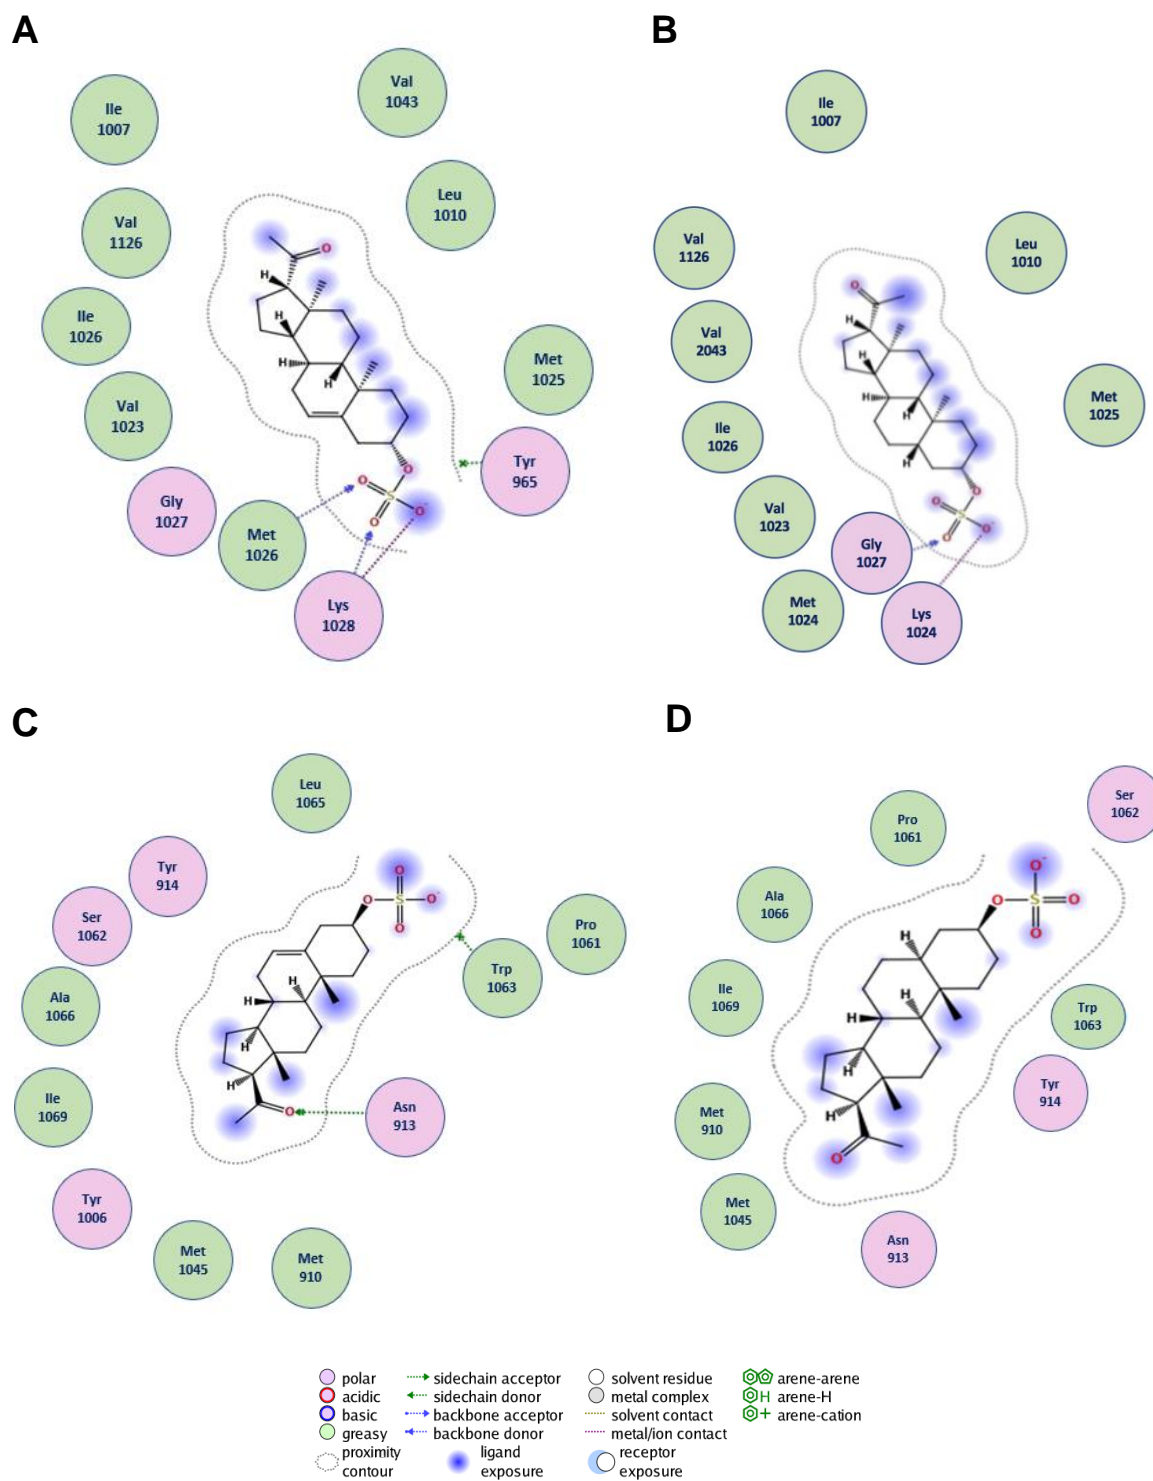

Supplementary Figure 6: Ligand interactions with PMA5S and PM5S in sites 1 and 2

Ligand interaction at site 1 (A and B) and site 2 (C and D) for pregnenolone sulfate (PMA5S) (A+C) and epiallopregnanolone sulfate (PM5S) (B+D).

| <b>Age (years)</b> | <b>Gender</b> | <b>BMI kg/m<sup>2</sup></b> |
|--------------------|---------------|-----------------------------|
| 46                 | Female        | 29.03                       |
| 38                 | Female        | 27                          |
| 40                 | Female        | 27.01                       |
| 43                 | Female        | 30                          |

Supplementary Table 1: Details of each donor human islets

| <b>Cohort 2 – BMI correlation</b> |          |            |
|-----------------------------------|----------|------------|
| <b>Progesterone Sulfate</b>       | <b>P</b> | <b>Rho</b> |
| PM5S                              | 0.0166   | 0.255      |
| PM3S                              | 0.0020   | 0.424      |
| PM3DiS                            | 0.4682   | -0.078     |
| PM2DiS                            | 0.5730   | -0.061     |
| PM4S                              | 0.0112   | -0.269     |
| PMΔ5S                             | 0.0410   | -0.218     |

Supplementary Table 2: BMI correlations with progesterone sulfates in women with GDM (Cohort 2).

Spearman's rank correlation coefficient (Rho) was used to assess correlations.



| <b>Cohort 2</b>                       | <b>PM3S</b> | <b>PM2DiS</b> | <b>PM3DiS</b> | <b>PM5S</b> | <b>PM4S</b> | <b>PMΔ5S</b> |
|---------------------------------------|-------------|---------------|---------------|-------------|-------------|--------------|
| <b>All patients (Non-GDM and GDM)</b> | -0.145      | 0.029         | -0.065        | 0.025       | -0.029      | -0.119       |
| <b>GDM Patients only</b>              | -0.215      | 0.229         | 0.088         | -0.022      | -0.182      | -0.342       |
| <b>Cohort 3</b>                       |             |               |               |             |             |              |
| <b>All patients (Non-GDM and GDM)</b> | -0.254*     | -0.067        | 0.076         | -0.333*     | -0.239*     | -0.060       |
| <b>GDM Patients only</b>              | -0.121      | 0.018         | 0.136         | -0.082      | -0.036      | -0.034       |

Supplementary Table 3: Fasting glucose correlations with progesterone sulfates in women with GDM (Cohort 2+3).

Spearman's rank correlation coefficient was used to assess correlations, results with \* signifies  $P < 0.05$ . Cohort 2, all patients  $n = 89$ , GDM patients only  $n = 25$ . Cohort 3 each group were collated irrespective of BMI, all patients  $n = 266$ , GDM patients only  $n = 114$ .

A

| Cohort 4: BMI $\leq$ 25 kg/m <sup>2</sup> |                  |      |                      |
|-------------------------------------------|------------------|------|----------------------|
| Biochemical marker                        | OR (95% CI)      | P    | Area under ROC curve |
| PM5S                                      | 0.82 (0.46-1.45) | 0.49 | 0.46 (0.34-0.57)     |
| PM3S                                      | 0.98 (0.51-1.86) | 0.94 | 0.50 (0.38-0.61)     |

B

| Cohort 4: BMI $\geq$ 35 kg/m <sup>2</sup> |                  |      |                      |
|-------------------------------------------|------------------|------|----------------------|
| Biochemical marker                        | OR (95% CI)      | P    | Area under ROC curve |
| PM5S                                      | 1.66 (0.99-2.77) | 0.05 | 0.60 (0.49-0.72)     |
| PM3S                                      | 0.76 (0.38-1.53) | 0.44 | 0.46 (0.35-0.58)     |

Supplementary Table 4: Logistic regression analysis of PM5S and PM3S as predictors of GDM at 11-13 weeks gestation.

A

| Energy (kcal/mol) | RMSD      | Ligand |
|-------------------|-----------|--------|
| -6.8199997        | 1.1125467 | PM5S   |
| -6.6702867        | 1.4927102 | PMΔ5S  |
| -6.5948405        | 2.1555789 | PMΔ5S  |
| -6.5424743        | 1.2312251 | PM4S   |
| -6.439683         | 1.8100771 | PM5S   |
| -6.4153433        | 2.1325195 | PMΔ5S  |
| -6.4101419        | 1.6385957 | PM3S   |
| -6.4068756        | 1.9603847 | PM5S   |
| -6.3827085        | 1.5345517 | PMΔ5S  |
| -6.3573208        | 1.8047764 | PMΔ5S  |
| -6.3540144        | 2.3486347 | PM3S   |
| -6.3538809        | 2.0648024 | PM5S   |
| -6.3411345        | 2.4843247 | PM5S   |
| -6.0677705        | 3.4442627 | PM3S   |
| -6.063601         | 1.3541986 | PM4S   |
| -5.8733807        | 1.5544147 | PM4S   |
| -5.8704696        | 2.3242292 | PM3S   |
| -5.8615518        | 1.7133332 | PM4S   |
| -5.8240767        | 2.1893353 | PM3S   |
| -5.7720551        | 1.5481328 | PM4S   |

B

| Energy (kcal/mol) | RMSD       | Ligand |
|-------------------|------------|--------|
| -6.8524556        | 1.4652321  | PMΔ5S  |
| -6.7510605        | 1.3558685  | PM5S   |
| -6.6705761        | 0.96520036 | PMΔ5S  |
| -6.6407328        | 3.300529   | PM5S   |
| -6.5805449        | 1.3545821  | PMΔ5S  |
| -6.5199375        | 2.2168357  | PMΔ5S  |
| -6.4493017        | 1.5938253  | PMΔ5S  |
| -6.3897424        | 3.51401    | PM3S   |
| -6.3854003        | 2.3206003  | PM5S   |
| -6.3802776        | 2.2265522  | PM3S   |
| -6.322556         | 1.9600726  | PM3S   |
| -6.3022604        | 2.1742473  | PM5S   |
| -6.2860308        | 1.9575782  | PM5S   |
| -6.2518678        | 2.4348776  | PM3S   |
| -6.2481518        | 0.88207519 | PM4S   |
| -6.1969061        | 4.4030252  | PM3S   |
| -6.0141978        | 1.0526633  | PM4S   |
| -6.0022035        | 2.6718736  | PM4S   |
| -5.987834         | 0.97104383 | PM4S   |
| -5.9865279        | 2.0926847  | PM4S   |

C

| Energy (kcal/mol) | RMSD      | Ligand |
|-------------------|-----------|--------|
| -6.0231051        | 2.7763674 | PM5S   |
| -5.9996939        | 1.6458317 | PM5S   |
| -5.9769263        | 1.0221686 | PM5S   |
| -5.9701791        | 2.7118475 | PMΔ5S  |
| -5.9436126        | 3.4987359 | PMΔ5S  |
| -5.9239669        | 1.8993984 | PMΔ5S  |
| -5.9137206        | 3.8773561 | PM3S   |
| -5.9122968        | 2.45784   | PM5S   |
| -5.8920221        | 1.3614609 | PM4S   |
| -5.8661146        | 2.0471373 | PM5S   |
| -5.8643146        | 1.8455839 | PMΔ5S  |
| -5.8574042        | 1.4660836 | PM4S   |
| -5.8362899        | 4.5342412 | PM3S   |
| -5.754652         | 1.5124441 | PMΔ5S  |
| -5.6872506        | 2.2099655 | PM4S   |
| -5.6868806        | 3.8968232 | PM3S   |
| -5.5618906        | 1.6737609 | PM4S   |
| -5.5287905        | 3.2175353 | PM3S   |
| -5.5134492        | 3.1202154 | PM3S   |
| -5.4297891        | 1.4013846 | PM4S   |

Supplementary Table 5: Table detailing the affinity of the poses the progesterone sulfates form at each docking site.

(A) and (B) shows the positions tested in sites 1 and 2 respectively, the highlighted row indicates the best position PM5S binds in both sites. (C) shows the positions tested in site 3. PMΔ5S, PM3S, PM4S and PM5S were all tested at these docking sites. The energy represents the affinity for that dock pose in the active site. RMSD, root-mean-square deviation of atomic position.
