# Supplementary material
Source: publisher figshare collection journal article supplement (https://diabetesjournals.figshare.com/articles/dataset/_/18813578)
Supplement: Supplementary file 2 [file 1]

## Checklist for Reporting Human Islet Preparations Used in Research

Adapted from Hart NJ, Powers AC (2018) Progress, challenges, and suggestions for using human islets to understand islet biology and human diabetes. Diabetologia <https://doi.org/10.1007/s00125-018-4772-2>.

|                                                                                                                                                                                                                                                                                                                                                                                                                                              |                                                      |
|----------------------------------------------------------------------------------------------------------------------------------------------------------------------------------------------------------------------------------------------------------------------------------------------------------------------------------------------------------------------------------------------------------------------------------------------|------------------------------------------------------|
| <b>Manuscript DOI:</b> <a href="https://doi.org/10.2337/db21-0702">https://doi.org/10.2337/db21-0702</a>                                                                                                                                                                                                                                                                                                                                     |                                                      |
| <b>Title:</b> Sulfated progesterone metabolites that enhance insulin secretion via TRPM3 are reduced in serum from women with gestational diabetes mellitus                                                                                                                                                                                                                                                                                  |                                                      |
| <b>Author list:</b> Hei Man Fan, Alice Mitchell, Elena Bellafante, Saraid McIlvrde, Laura Primicheru, Mirko Giorgi, Ivano Eberini, Argyro Syngelaki, Anita Lövgren-Sandblom, Peter Jones, David McCance, Nithya Sukumar, Nishanthi Periyathambi, Katharine Hunt, Kypros Nicolaides, David Andersson, Stuart Bevan, Paul Seed, Gavin Bewick, James Bowe, Franca Fraternali, Ponnusamy Saravanan, Hanns-Ulrich Marschall, Catherine Williamson |                                                      |
| <b>Corresponding author:</b> Catherine Williamson                                                                                                                                                                                                                                                                                                                                                                                            | <b>Email address:</b> Catherine.williamson@kcl.ac.uk |

| Islet preparation     | 1      | 2      | 3      | 4      | 5 | 6 | 7 | 8 <sup>a</sup> |
|-----------------------|--------|--------|--------|--------|---|---|---|----------------|
| MANDATORY INFORMATION |        |        |        |        |   |   |   |                |
| Unique identifier     | 132710 | 133181 | 136993 | 137645 |   |   |   |                |
| Donor age (years)     | 46     | 38     | 40     | 43     |   |   |   |                |
| Donor sex (M/F)       | F      | F      | F      | F      |   |   |   |                |

|                                                                             |                                                    |                                                    |                                                    |                                                    |  |  |  |  |
|-----------------------------------------------------------------------------|----------------------------------------------------|----------------------------------------------------|----------------------------------------------------|----------------------------------------------------|--|--|--|--|
| Donor BMI (kg/m <sup>2</sup> )                                              | 29.03                                              | 27                                                 | 27.01                                              | 30                                                 |  |  |  |  |
| Donor HbA <sub>1c</sub> or other measure of blood glucose control           | n/a donors were non-diabetic                       |  |  |  |  |
| Origin/source of islets <sup>b</sup>                                        | King's College Hospital islet transplantation unit |  |  |  |  |
| Islet isolation centre                                                      | King's College Hospital islet transplantation unit |  |  |  |  |
| Donor history of diabetes? Yes/No                                           | No                                                 | No                                                 | No                                                 | No                                                 |  |  |  |  |
| <b>If Yes, complete the next two lines if this information is available</b> |                                                    |                                                    |                                                    |                                                    |  |  |  |  |
| Diabetes duration (years)                                                   |                                                    |                                                    |                                                    |                                                    |  |  |  |  |
| Glucose-lowering therapy at time of death <sup>c</sup>                      |                                                    |                                                    |                                                    |                                                    |  |  |  |  |

| RECOMMENDED INFORMATION |  |  |  |  |  |  |  |  |
|-------------------------|--|--|--|--|--|--|--|--|
| Donor cause of death    |  |  |  |  |  |  |  |  |
| Warm ischaemia time (h) |  |  |  |  |  |  |  |  |

|                                                                                   |    |    |    |    |  |  |  |  |
|-----------------------------------------------------------------------------------|----|----|----|----|--|--|--|--|
| Cold ischaemia time (h)                                                           |    |    |    |    |  |  |  |  |
| Estimated purity (%)                                                              | 50 | 60 | 50 | 65 |  |  |  |  |
| Estimated viability (%)                                                           | 60 | 80 | 80 | 75 |  |  |  |  |
| Total culture time (h) <sup>d</sup>                                               | 36 | 36 | 36 | 36 |  |  |  |  |
| Glucose-stimulated insulin secretion or other functional measurement <sup>e</sup> |    |    |    |    |  |  |  |  |
| Handpicked to purity?<br>Yes/No                                                   |    |    |    |    |  |  |  |  |
| Additional notes                                                                  |    |    |    |    |  |  |  |  |

<sup>a</sup>If you have used more than eight islet preparations, please complete additional forms as necessary

<sup>b</sup>For example, IIDP, ECIT, Alberta IsletCore

<sup>c</sup>Please specify the therapy/therapies

<sup>d</sup>Time of islet culture at the isolation centre, during shipment and at the receiving laboratory

<sup>e</sup>Please specify the test and the results
